# Supplementary material
Source: PubMed Central journal article supplement (PMC4084460)
Supplement: 1402333111_pnas.201402333SI.pdf [file 1402333111_pnas.201402333SI.pdf]

# Supporting Information

Fang et al. 10.1073/pnas.1402333111

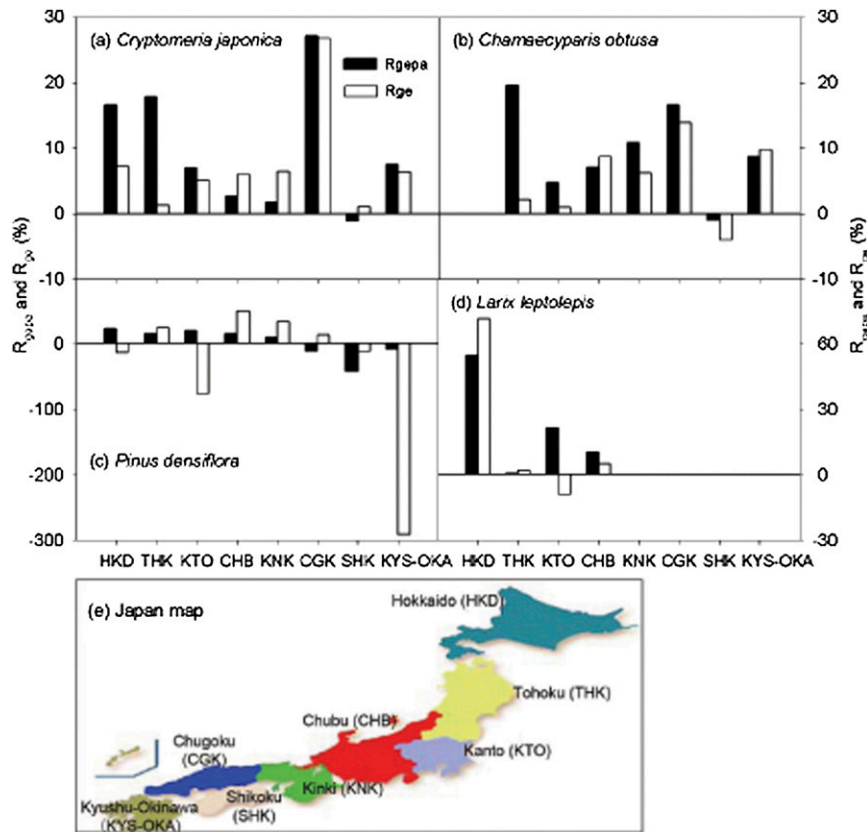

**Fig. S1.** Regional distribution of the effects of environmental changes on tree growth of various planted forest types in Japan. The effects of environmental changes on tree growth were described as growth enhancement per area ( $R_{gpa}$ ) or the ratio of total growth enhancement to net biomass increase ( $R_{ge}$ ). (A) Japanese cedar, (B) Japanese cypress, (C) Japanese red pine, (D) Japanese larch plantations, and (E) map of Japan showing regional divisions used in this study. Following Japanese inventories, the country was divided into eight regions: Hokkaido (HKD), Tohoku (THK), Kanto (KTO), Chubu (CHB), Kinki (KNK), Chugoku (CGK), Shikoku (SHK), and Kyushu-Okinawa (KYS-OKA).

**Table S1. Parameters used for estimation of biomass expansion factor**

| Forest type                 | $n$ | $a$ , $\text{Mg}\cdot\text{m}^{-3}$ | $b$ , $\text{Mg}\cdot\text{ha}^{-1}$ | $r^2$ |
|-----------------------------|-----|-------------------------------------|--------------------------------------|-------|
| <i>Cryptomeria japonica</i> | 212 | 0.4878                              | 19.4830                              | 0.98  |
| <i>Chamaecyparis obtusa</i> | 149 | 0.5580                              | 33.9560                              | 0.96  |
| <i>Pinus densiflora</i>     | 106 | 0.5687                              | 15.3300                              | 0.92  |
| <i>Larix leptolepis</i>     | 36  | 0.5968                              | 16.7000                              | 0.95  |

Parameters obtained from Fang et al. (1). Biomass expansion factor (BEF) is expressed as a function of stand stem volume per hectare ( $x$ ),  $BEF = a + bx$ , where  $a$  and  $b$  are constants for each forest type, respectively.

1. Fang JY, Oikawa T, Kato T, Mo WH, Wang ZH (2005) Biomass carbon accumulation by Japan's forests from 1947-1995. *Global Biogeochem Cycles* 19:GB2004, 10.1029/2004GB002253.

**Table S2. Forest area, biomass density, and stock over age sequence in Japan's *C. japonica* plantation during the period 1980–2005**

|        | Area, 10 <sup>4</sup> ha |       |       |       |       |       | Biomass carbon density, Mg C/ha |       |       |       |       |       | Biomass carbon stock, Tg C |       |       |       |       |       |  |
|--------|--------------------------|-------|-------|-------|-------|-------|---------------------------------|-------|-------|-------|-------|-------|----------------------------|-------|-------|-------|-------|-------|--|
|        | 1980                     | 1985  | 1990  | 1995  | 2000  | 2005  | 1980                            | 1985  | 1990  | 1995  | 2000  | 2005  | 1980                       | 1985  | 1990  | 1995  | 2000  | 2005  |  |
| Total  | 426.5                    | 443.7 | 450.7 | 448.6 | 442.9 | 437.3 | 42.0                            | 51.4  | 59.0  | 67.0  | 80.3  | 89.5  | 179.1                      | 228.3 | 265.7 | 300.5 | 355.5 | 391.5 |  |
| Age, y |                          |       |       |       |       |       |                                 |       |       |       |       |       |                            |       |       |       |       |       |  |
| 5      | 31.7                     | 21.3  | 14.4  | 9.6   | 3.7   | 2.1   | 9.8                             | 9.8   | 9.8   | 9.8   | 9.8   | 9.8   | 3.1                        | 2.1   | 1.4   | 0.9   | 0.4   | 0.2   |  |
| 10     | 47.0                     | 33.3  | 25.4  | 14.3  | 7.2   | 5.0   | 10.9                            | 11.0  | 11.1  | 11.4  | 11.2  | 11.0  | 5.1                        | 3.7   | 2.8   | 1.6   | 0.8   | 0.6   |  |
| 15     | 71.1                     | 46.5  | 35.0  | 25.5  | 11.3  | 7.2   | 21.5                            | 21.8  | 21.8  | 22.6  | 22.4  | 23.2  | 15.3                       | 10.2  | 7.6   | 5.8   | 2.5   | 1.7   |  |
| 20     | 81.0                     | 70.1  | 50.6  | 35.1  | 21.3  | 11.4  | 34.2                            | 34.0  | 33.9  | 34.1  | 34.1  | 34.2  | 27.7                       | 23.8  | 17.1  | 12.0  | 7.3   | 3.9   |  |
| 25     | 75.7                     | 78.7  | 72.3  | 50.2  | 33.0  | 21.6  | 47.4                            | 48.3  | 47.0  | 47.1  | 46.9  | 47.1  | 35.9                       | 38.0  | 34.0  | 23.6  | 15.5  | 10.2  |  |
| 30     | 50.5                     | 74.8  | 78.8  | 72.1  | 43.8  | 33.0  | 60.2                            | 61.5  | 61.3  | 61.1  | 60.2  | 60.2  | 30.4                       | 46.0  | 48.4  | 44.1  | 26.3  | 19.8  |  |
| 35     | 19.9                     | 49.7  | 69.3  | 77.9  | 66.1  | 43.6  | 74.5                            | 73.0  | 74.0  | 73.5  | 73.2  | 72.5  | 14.8                       | 36.3  | 51.3  | 57.2  | 48.4  | 31.6  |  |
| 40     | 13.9                     | 19.5  | 41.9  | 68.1  | 76.3  | 65.0  | 83.8                            | 84.8  | 84.8  | 83.0  | 85.1  | 84.6  | 11.6                       | 16.5  | 35.6  | 56.6  | 64.9  | 55.0  |  |
| 45     | 12.1                     | 13.6  | 16.0  | 39.8  | 72.0  | 75.1  | 90.9                            | 94.3  | 95.7  | 92.1  | 95.8  | 95.5  | 11.0                       | 12.8  | 15.3  | 36.6  | 69.0  | 71.7  |  |
| 50     | 9.9                      | 11.1  | 12.6  | 15.5  | 49.2  | 71.5  | 96.4                            | 100.1 | 102.1 | 101.0 | 103.5 | 105.6 | 9.6                        | 11.1  | 12.8  | 15.6  | 50.9  | 75.5  |  |
| 55     | 7.8                      | 9.0   | 9.9   | 11.8  | 20.2  | 48.3  | 103.0                           | 104.3 | 107.0 | 107.0 | 110.2 | 114.0 | 8.0                        | 9.4   | 10.6  | 12.7  | 22.3  | 55.1  |  |
| 60     | 6.1                      | 6.9   | 7.8   | 9.2   | 12.0  | 20.0  | 108.8                           | 109.8 | 111.6 | 111.9 | 117.4 | 118.0 | 6.6                        | 7.6   | 8.7   | 10.2  | 14.0  | 23.6  |  |
| 65     |                          | 5.5   | 5.9   | 6.8   | 9.4   | 11.8  |                                 | 114.0 | 117.4 | 115.7 | 120.7 | 123.8 |                            | 6.3   | 7.0   | 7.9   | 11.3  | 14.6  |  |
| 70     |                          | 3.8   | 4.6   | 5.6   | 7.3   | 9.2   |                                 | 120.0 | 120.7 | 120.0 | 123.8 | 127.6 |                            | 4.6   | 5.5   | 6.7   | 9.1   | 11.7  |  |
| 75     |                          |       | 3.7   | 4.1   | 5.6   | 7.2   |                                 |       | 125.3 | 122.8 | 126.6 | 129.7 |                            |       | 4.7   | 5.0   | 7.1   | 9.3   |  |
| 80     |                          |       | 2.4   | 3.2   | 4.4   | 5.2   |                                 |       | 124.4 | 125.6 | 129.9 | 131.9 |                            |       | 3.0   | 4.0   | 5.7   | 6.9   |  |

**Table S3. Forest area, biomass density, and stock over age sequence in Japan's *C. obtusa* plantation during the period 1980–2005**

|        | Area, 10 <sup>4</sup> ha |       |       |       |       |       | Biomass carbon density, Mg C/ha |       |       |       |       |       | Biomass carbon stock, Tg C |       |       |       |       |       |  |
|--------|--------------------------|-------|-------|-------|-------|-------|---------------------------------|-------|-------|-------|-------|-------|----------------------------|-------|-------|-------|-------|-------|--|
|        | 1980                     | 1985  | 1990  | 1995  | 2000  | 2005  | 1980                            | 1985  | 1990  | 1995  | 2000  | 2005  | 1980                       | 1985  | 1990  | 1995  | 2000  | 2005  |  |
| Total  | 203.8                    | 228.7 | 242.2 | 249.5 | 250.9 | 251.0 | 40.1                            | 46.4  | 52.0  | 59.0  | 69.5  | 77.2  | 81.7                       | 106.1 | 125.9 | 147.1 | 174.3 | 193.8 |  |
| Age, y |                          |       |       |       |       |       |                                 |       |       |       |       |       |                            |       |       |       |       |       |  |
| 5      | 26.9                     | 20.5  | 16.3  | 11.5  | 4.4   | 2.0   | 17.0                            | 17.0  | 17.0  | 17.0  | 17.0  | 17.0  | 4.6                        | 3.5   | 2.8   | 2.0   | 0.7   | 0.3   |  |
| 10     | 33.4                     | 28.0  | 23.9  | 15.4  | 9.3   | 6.4   | 18.2                            | 18.3  | 18.3  | 18.3  | 18.2  | 18.0  | 6.1                        | 5.1   | 4.4   | 2.8   | 1.7   | 1.2   |  |
| 15     | 35.6                     | 34.7  | 29.4  | 23.3  | 13.9  | 9.4   | 27.4                            | 28.5  | 28.3  | 29.6  | 28.8  | 29.1  | 9.8                        | 9.9   | 8.3   | 6.9   | 4.0   | 2.7   |  |
| 20     | 31.7                     | 36.9  | 36.8  | 28.6  | 20.6  | 13.9  | 36.8                            | 38.2  | 38.8  | 39.9  | 39.4  | 39.1  | 11.7                       | 14.1  | 14.3  | 11.4  | 8.1   | 5.4   |  |
| 25     | 28.0                     | 31.9  | 35.3  | 36.0  | 28.7  | 20.6  | 47.2                            | 49.3  | 50.0  | 51.8  | 51.6  | 50.9  | 13.2                       | 15.7  | 17.6  | 18.6  | 14.8  | 10.5  |  |
| 30     | 16.8                     | 28.7  | 31.6  | 35.7  | 33.6  | 28.5  | 56.8                            | 59.3  | 61.4  | 62.6  | 63.5  | 63.3  | 9.5                        | 17.0  | 19.4  | 22.4  | 21.3  | 18.1  |  |
| 35     | 6.2                      | 16.6  | 25.7  | 32.0  | 38.0  | 33.0  | 68.9                            | 68.2  | 71.3  | 73.5  | 74.9  | 75.1  | 4.2                        | 11.3  | 18.3  | 23.5  | 28.4  | 24.8  |  |
| 40     | 5.3                      | 5.9   | 13.5  | 26.2  | 32.1  | 37.5  | 78.7                            | 79.4  | 80.0  | 78.9  | 83.7  | 85.5  | 4.1                        | 4.7   | 10.8  | 20.7  | 26.9  | 32.1  |  |
| 45     | 5.8                      | 5.1   | 5.0   | 13.6  | 28.1  | 31.6  | 84.9                            | 87.8  | 90.6  | 86.2  | 90.5  | 92.4  | 4.9                        | 4.5   | 4.5   | 11.7  | 25.4  | 29.1  |  |
| 50     | 5.4                      | 5.2   | 4.9   | 5.2   | 17.1  | 28.7  | 90.5                            | 92.8  | 95.9  | 91.9  | 95.1  | 97.5  | 4.9                        | 4.8   | 4.7   | 4.8   | 16.3  | 28.0  |  |
| 55     | 4.8                      | 4.8   | 4.6   | 4.9   | 6.5   | 17.3  | 96.3                            | 96.5  | 99.4  | 97.5  | 99.9  | 101.4 | 4.6                        | 4.7   | 4.6   | 4.8   | 6.5   | 17.5  |  |
| 60     | 4.1                      | 4.0   | 4.0   | 4.5   | 4.4   | 6.7   | 100.2                           | 100.8 | 102.8 | 100.0 | 105.8 | 104.5 | 4.1                        | 4.1   | 4.2   | 4.5   | 4.6   | 7.0   |  |
| 65     |                          | 3.6   | 3.6   | 3.9   | 4.2   | 4.3   |                                 | 104.2 | 106.6 | 101.6 | 107.3 | 109.1 |                            | 3.7   | 3.8   | 4.0   | 4.5   | 4.7   |  |
| 70     |                          | 2.9   | 3.1   | 3.5   | 3.9   | 4.2   |                                 | 105.8 | 108.3 | 104.0 | 108.5 | 110.7 |                            | 3.1   | 3.3   | 3.7   | 4.2   | 4.7   |  |
| 75     |                          |       | 2.6   | 2.8   | 3.3   | 3.8   |                                 |       | 111.0 | 105.5 | 109.8 | 111.1 |                            |       | 2.9   | 3.0   | 3.6   | 4.2   |  |
| 80     |                          |       | 1.8   | 2.3   | 2.9   | 3.2   |                                 |       | 106.7 | 105.8 | 111.3 | 111.3 |                            |       | 1.9   | 2.4   | 3.2   | 3.6   |  |

**Table S4. Forest area, biomass density, and stock over age sequence in Japan's *P. densiflora* plantation during the period 1980–2005**

|        | Area, 10 <sup>4</sup> ha |       |       |      |      |      | Biomass carbon density, Mg C/ha |      |      |      |      |      | Biomass carbon stock, Tg C |      |      |      |      |      |
|--------|--------------------------|-------|-------|------|------|------|---------------------------------|------|------|------|------|------|----------------------------|------|------|------|------|------|
|        | 1980                     | 1985  | 1990  | 1995 | 2000 | 2005 | 1980                            | 1985 | 1990 | 1995 | 2000 | 2005 | 1980                       | 1985 | 1990 | 1995 | 2000 | 2005 |
| Total  | 117.6                    | 107.5 | 101.9 | 97.1 | 88.9 | 86.2 | 29.2                            | 37.2 | 44.0 | 50.4 | 62.0 | 67.6 | 34.4                       | 40.0 | 44.8 | 48.9 | 55.1 | 58.3 |
| Age, y |                          |       |       |      |      |      |                                 |      |      |      |      |      |                            |      |      |      |      |      |
| 5      | 5.5                      | 1.6   | 0.7   | 0.3  | 0.1  | 0.1  | 7.7                             | 7.7  | 7.7  | 7.9  | 7.7  | 8.6  | 0.4                        | 0.1  | 0.1  | 0.0  | 0.0  | 0.0  |
| 10     | 12.9                     | 5.4   | 2.5   | 0.9  | 0.2  | 0.1  | 9.2                             | 9.7  | 10.0 | 10.0 | 8.7  | 8.5  | 1.2                        | 0.5  | 0.2  | 0.1  | 0.0  | 0.0  |
| 15     | 24.2                     | 11.9  | 6.0   | 2.9  | 0.5  | 0.2  | 18.4                            | 19.3 | 19.3 | 20.3 | 19.1 | 15.7 | 4.5                        | 2.3  | 1.2  | 0.6  | 0.1  | 0.0  |
| 20     | 29.1                     | 21.6  | 12.6  | 6.7  | 1.6  | 0.5  | 27.3                            | 28.7 | 29.0 | 29.7 | 29.9 | 27.8 | 8.0                        | 6.2  | 3.7  | 2.0  | 0.5  | 0.1  |
| 25     | 19.9                     | 26.2  | 21.8  | 13.0 | 4.4  | 1.7  | 35.8                            | 38.0 | 38.1 | 39.2 | 42.2 | 41.0 | 7.1                        | 9.9  | 8.3  | 5.1  | 1.9  | 0.7  |
| 30     | 10.9                     | 17.8  | 24.8  | 21.3 | 8.9  | 4.6  | 43.9                            | 45.9 | 48.4 | 47.2 | 51.1 | 51.3 | 4.8                        | 8.2  | 12.0 | 10.0 | 4.5  | 2.4  |
| 35     | 4.9                      | 9.6   | 14.9  | 22.6 | 17.4 | 9.2  | 48.6                            | 49.9 | 53.9 | 56.2 | 58.4 | 59.2 | 2.4                        | 4.8  | 8.0  | 12.7 | 10.2 | 5.5  |
| 40     | 2.9                      | 4.2   | 7.6   | 13.6 | 22.0 | 17.4 | 54.5                            | 53.3 | 56.3 | 59.3 | 64.1 | 65.1 | 1.6                        | 2.2  | 4.3  | 8.0  | 14.1 | 11.3 |
| 45     | 2.4                      | 2.6   | 3.1   | 6.5  | 16.8 | 21.3 | 57.9                            | 58.8 | 59.4 | 62.2 | 70.1 | 70.4 | 1.4                        | 1.5  | 1.8  | 4.0  | 11.8 | 15.0 |
| 50     | 2.1                      | 2.0   | 2.1   | 2.6  | 8.0  | 15.5 | 59.8                            | 60.1 | 62.5 | 64.2 | 71.6 | 75.6 | 1.3                        | 1.2  | 1.3  | 1.7  | 5.7  | 11.8 |
| 55     | 1.6                      | 1.8   | 1.6   | 1.9  | 3.2  | 7.5  | 64.6                            | 61.1 | 65.8 | 67.2 | 71.0 | 75.9 | 1.0                        | 1.1  | 1.1  | 1.3  | 2.3  | 5.7  |
| 60     | 1.2                      | 1.2   | 1.4   | 1.5  | 1.7  | 3.1  | 67.9                            | 65.6 | 66.2 | 64.4 | 71.3 | 72.9 | 0.8                        | 0.8  | 0.9  | 1.0  | 1.2  | 2.2  |
| 65     |                          | 0.9   | 0.9   | 1.3  | 1.4  | 1.7  |                                 | 69.6 | 71.7 | 67.3 | 70.4 | 72.8 |                            | 0.6  | 0.6  | 0.9  | 1.0  | 1.2  |
| 70     |                          | 0.8   | 0.7   | 0.9  | 1.3  | 1.3  |                                 | 66.7 | 73.6 | 70.9 | 67.9 | 70.4 |                            | 0.5  | 0.5  | 0.6  | 0.9  | 0.9  |
| 75     |                          |       | 0.8   | 0.7  | 0.8  | 1.3  |                                 |      | 69.9 | 68.9 | 70.6 | 68.5 |                            |      | 0.5  | 0.5  | 0.6  | 0.9  |
| 80     |                          |       | 0.4   | 0.6  | 0.7  | 0.8  |                                 |      | 73.6 | 66.3 | 70.2 | 68.7 |                            |      | 0.3  | 0.4  | 0.5  | 0.6  |

**Table S5. Forest area, biomass density, and stock over age sequence in Japan's *L. leptolepis* plantation during the period 1980–2005**

|        | Area, 10 <sup>4</sup> ha |       |       |       |       |       | Biomass carbon density (Mg C/ha) |      |      |      |      |      | Biomass carbon stock, Tg C |      |      |      |      |      |
|--------|--------------------------|-------|-------|-------|-------|-------|----------------------------------|------|------|------|------|------|----------------------------|------|------|------|------|------|
|        | 1980                     | 1985  | 1990  | 1995  | 2000  | 2005  | 1980                             | 1985 | 1990 | 1995 | 2000 | 2005 | 1980                       | 1985 | 1990 | 1995 | 2000 | 2005 |
| Total  | 110.2                    | 108.5 | 107.9 | 106.7 | 104.0 | 101.0 | 34.2                             | 43.9 | 50.0 | 56.4 | 64.9 | 69.9 | 37.7                       | 47.7 | 54.0 | 60.2 | 67.5 | 70.6 |
| Age, y |                          |       |       |       |       |       |                                  |      |      |      |      |      |                            |      |      |      |      |      |
| 5      | 5.3                      | 3.3   | 2.5   | 1.8   | 1.2   | 1.4   | 8.4                              | 8.4  | 8.4  | 8.4  | 8.4  | 8.4  | 0.4                        | 0.3  | 0.2  | 0.1  | 0.1  | 0.1  |
| 10     | 13.3                     | 5.4   | 3.7   | 2.5   | 1.5   | 1.2   | 8.6                              | 8.8  | 9.0  | 9.4  | 10.1 | 9.5  | 1.1                        | 0.5  | 0.3  | 0.2  | 0.1  | 0.1  |
| 15     | 21.3                     | 12.1  | 6.1   | 3.7   | 2.2   | 1.4   | 26.2                             | 29.0 | 26.4 | 25.5 | 29.9 | 36.3 | 5.6                        | 3.5  | 1.6  | 1.0  | 0.7  | 0.5  |
| 20     | 25.2                     | 19.9  | 13.9  | 6.1   | 3.1   | 2.2   | 35.1                             | 38.9 | 42.0 | 40.2 | 39.2 | 48.9 | 8.9                        | 7.7  | 5.8  | 2.5  | 1.2  | 1.1  |
| 25     | 24.2                     | 23.2  | 20.3  | 13.9  | 5.1   | 3.2   | 42.3                             | 45.2 | 48.7 | 54.5 | 49.7 | 52.2 | 10.2                       | 10.5 | 9.9  | 7.6  | 2.5  | 1.7  |
| 30     | 13.8                     | 23.9  | 23.7  | 19.9  | 9.6   | 5.1   | 49.7                             | 50.9 | 52.5 | 58.3 | 62.4 | 60.4 | 6.9                        | 12.1 | 12.4 | 11.6 | 6.0  | 3.1  |
| 35     | 3.0                      | 13.9  | 21.1  | 23.7  | 17.8  | 9.5   | 57.6                             | 58.4 | 58.3 | 59.8 | 68.7 | 71.2 | 1.7                        | 8.1  | 12.3 | 14.2 | 12.2 | 6.8  |
| 40     | 1.7                      | 2.8   | 10.9  | 20.3  | 20.4  | 17.7  | 66.0                             | 66.1 | 64.5 | 62.4 | 66.6 | 74.9 | 1.1                        | 1.8  | 7.0  | 12.7 | 13.6 | 13.2 |
| 45     | 0.9                      | 1.5   | 1.9   | 9.8   | 22.4  | 20.2  | 69.4                             | 72.9 | 72.5 | 67.2 | 68.2 | 71.3 | 0.6                        | 1.1  | 1.4  | 6.6  | 15.3 | 14.4 |
| 50     | 0.6                      | 0.8   | 1.3   | 1.7   | 13.7  | 21.4  | 69.6                             | 74.9 | 76.0 | 75.4 | 73.5 | 72.5 | 0.4                        | 0.6  | 1.0  | 1.3  | 10.1 | 15.5 |
| 55     | 0.6                      | 0.5   | 0.6   | 1.2   | 3.7   | 12.2  | 74.9                             | 76.5 | 79.6 | 76.1 | 78.8 | 77.5 | 0.4                        | 0.4  | 0.5  | 0.9  | 2.9  | 9.4  |
| 60     |                          | 0.5   | 0.5   | 0.6   | 1.3   | 2.9   | 70.5                             | 76.8 | 78.0 | 75.1 | 83.9 | 83.0 | 0.4                        | 0.4  | 0.4  | 0.5  | 1.1  | 2.4  |
| 65     |                          | 0.5   | 0.4   | 0.5   | 0.8   | 1.1   |                                  | 74.0 | 81.2 | 74.9 | 82.8 | 90.8 |                            | 0.3  | 0.4  | 0.4  | 0.7  | 1.0  |
| 70     |                          | 0.4   | 0.4   | 0.4   | 0.5   | 0.7   |                                  | 77.3 | 73.1 | 78.0 | 80.7 | 87.7 |                            | 0.3  | 0.3  | 0.3  | 0.4  | 0.6  |
| 75     |                          |       | 0.3   | 0.4   | 0.4   | 0.4   |                                  |      | 77.3 | 75.4 | 81.4 | 82.6 |                            |      | 0.2  | 0.3  | 0.3  | 0.4  |
| 80     |                          |       | 0.2   | 0.3   | 0.4   | 0.4   |                                  |      | 78.2 | 75.0 | 78.4 | 81.2 |                            |      | 0.2  | 0.2  | 0.3  | 0.3  |

**Table S6. Contribution of growth enhancement to biomass carbon accumulation for four major plantations by region during 1980–2005**

| Forest type                                | Region         | NBIPA, Mg C·ha <sup>-1</sup> | GEPA, Mg C·ha <sup>-1</sup> | $R_{gepa}$ , % | NBI, Tg C | TGE, Tg C | $R_{ger}$ , % |
|--------------------------------------------|----------------|------------------------------|-----------------------------|----------------|-----------|-----------|---------------|
| Japanese cedar<br>( <i>C. japonica</i> )   | Hokkaido       | 35.9                         | 5.9                         | 16.6           | 1.2       | 0.1       | 7.2           |
|                                            | Tohoku         | 39.8                         | 7.1                         | 17.8           | 53.0      | 0.7       | 1.2           |
|                                            | Kanto          | 48.2                         | 3.3                         | 6.9            | 15.9      | 0.8       | 5.0           |
|                                            | Chubu          | 44.5                         | 1.2                         | 2.6            | 36.7      | 2.2       | 6.0           |
|                                            | Kinki          | 46.5                         | 0.8                         | 1.7            | 18.9      | 1.2       | 6.4           |
|                                            | Chugoku        | 64.5                         | 17.5                        | 27.0           | 20.9      | 5.6       | 26.7          |
|                                            | Shikoku        | 49.2                         | -0.5                        | -1.1           | 18.5      | 0.2       | 1.1           |
|                                            | Kyushu-Okinawa | 56.5                         | 4.3                         | 7.6            | 47.3      | 3.0       | 6.4           |
|                                            | Country total  | 47.5                         | 4.0                         | 8.4            | 212.3     | 8.7       | 4.1           |
| Japanese cypress<br>( <i>C. obtusa</i> )   | Hokkaido       | —                            | —                           | —              | —         | —         | —             |
|                                            | Tohoku         | 17.5                         | 3.4                         | 19.6           | 1.3       | 0.0       | 2.2           |
|                                            | Kanto          | 29.1                         | 1.4                         | 4.7            | 5.9       | 0.1       | 1.0           |
|                                            | Chubu          | 29.7                         | 2.1                         | 7.1            | 22.7      | 2.0       | 8.7           |
|                                            | Kinki          | 38.5                         | 4.2                         | 10.9           | 16.8      | 1.0       | 6.2           |
|                                            | Chugoku        | 40.4                         | 6.7                         | 16.5           | 21.9      | 3.0       | 13.9          |
|                                            | Shikoku        | 34.7                         | -0.3                        | -0.9           | 15.8      | -0.6      | -4.0          |
|                                            | Kyushu-Okinawa | 49.3                         | 4.3                         | 8.7            | 27.5      | 2.7       | 9.8           |
|                                            | Country total  | 37.1                         | 4.1                         | 11.0           | 112.0     | 11.6      | 10.4          |
| Red pine<br>( <i>P. densiflora</i> )       | Hokkaido       | 18.9                         | 4.4                         | 23.3           | -0.5      | 0.1       | -13.0         |
|                                            | Tohoku         | 42.2                         | 6.8                         | 16.1           | 14.5      | 3.5       | 24.0          |
|                                            | Kanto          | 37.4                         | 7.4                         | 19.9           | -1.0      | 0.8       | -75.4         |
|                                            | Chubu          | 30.9                         | 4.9                         | 15.7           | 3.8       | 1.9       | 49.7          |
|                                            | Kinki          | 37.6                         | 3.9                         | 10.3           | 1.1       | 0.4       | 33.6          |
|                                            | Chugoku        | 43.5                         | -4.8                        | -11.0          | 5.5       | 0.7       | 13.4          |
|                                            | Shikoku        | 36.2                         | -15.0                       | -41.3          | 0.5       | -0.1      | -11.8         |
|                                            | Kyushu-Okinawa | 40.6                         | -3.3                        | -8.0           | -0.1      | 0.2       | -290.8        |
|                                            | Country total  | 38.3                         | 4.8                         | 12.6           | 23.9      | 8.5       | 35.5          |
| Japanese larch<br>( <i>L. leptolepis</i> ) | Hokkaido       | 38.1                         | 20.8                        | 54.5           | 13.8      | 9.9       | 71.4          |
|                                            | Tohoku         | 29.8                         | 0.2                         | 0.7            | 6.3       | 0.1       | 1.9           |
|                                            | Kanto          | 37.9                         | 8.1                         | 21.3           | 2.0       | -0.2      | -8.9          |
|                                            | Chubu          | 36.1                         | 3.7                         | 10.4           | 10.8      | 0.5       | 4.8           |
|                                            | Kinki          | —                            | —                           | —              | —         | —         | —             |
|                                            | Chugoku        | —                            | —                           | —              | —         | —         | —             |
|                                            | Shikoku        | —                            | —                           | —              | —         | —         | —             |
|                                            | Kyushu-Okinawa | —                            | —                           | —              | —         | —         | —             |
|                                            | Country total  | 35.7                         | 7.7                         | 21.6           | 32.9      | 11.4      | 34.7          |

For location of regions, see Fig. 3E. GEPA, growth enhancement per area; NBI, net biomass increase; NBIPA, net biomass increase per area;  $R_{ger}$ , ratio of TGE to NBI;  $R_{gepa}$ , ratio of GEPA to NBIPA; TGE, total growth enhancement.

**Table S7. Overall mean biomass density of young-age (e.g., 5-y-old) stands in Japan for different inventory periods**

| Species              | Biomass density, Mg C·ha <sup>-1</sup> |       |       |       |       |       |
|----------------------|----------------------------------------|-------|-------|-------|-------|-------|
|                      | 1980                                   | 1985  | 1990  | 1995  | 2000  | 2005  |
| <i>C. japonica</i>   | 9.82                                   | 9.83  | 9.83  | 9.80  | 9.83  | 9.83  |
| <i>C. obtusa</i>     | 16.99                                  | 16.99 | 16.98 | 16.99 | 16.99 | 16.99 |
| <i>P. densiflora</i> | 7.69                                   | 7.67  | 7.67  | 7.89  | 7.67  | 8.61  |
| <i>L. leptolepis</i> | 8.35                                   | 8.35  | 8.35  | 8.35  | 8.35  | 8.35  |

The similar initial standing biomass over time suggests similar silvicultural treatments at early stages of plantations over the study periods. Data are from Forest Inventory of Japan (1–6).

1. Japan Agency of Forestry (1982) *Forest Resources of Japan 1980* (Japan Agency of Forestry, Tokyo).
2. Japan Agency of Forestry (1987) *Forest Resources of Japan 1985* (Japan Agency of Forestry, Tokyo).
3. Japan Agency of Forestry (1992) *Forest Resources of Japan 1990* (Japan Agency of Forestry, Tokyo).
4. Japan Agency of Forestry (2000) *Forest Resources of Japan 1995* (Japan Agency of Forestry, Tokyo).
5. Japan Agency of Forestry (2003) *Forest Resources of Japan 2000* (Japan Agency of Forestry, Tokyo).
6. Japan Agency of Forestry (2008) *Forest Resources of Japan 2005* (Japan Agency of Forestry, Tokyo).
